# Supplementary material for: Unveiling the correlation between structural and magnetic ordering in nano Co1−xNixTeO4
Source: Royal Society of Chemistry journal article supplement (doi:10.1039/d2cp05592a), 2022-12-16
Supplement: d2cp05592a1.pdf [file d2cp05592a1.pdf]

## Supplementary Materials

### **Unveiling the correlation between structural and magnetic ordering in nano $\text{Co}_{1-x}\text{Ni}_x\text{TeO}_4$**

Akhilesh Kumar Patel<sup>1</sup>, S. Shanmukharao Samatham<sup>2</sup>, Ekta Rani<sup>3</sup>, K. G. Suresh<sup>1</sup>, Harishchandra Singh<sup>3,1,\*</sup>

<sup>1</sup>Department of Physics, Indian Institute of Technology Bombay, Mumbai 400 076, India

<sup>2</sup>Department of Physics, Chaitanya Bharathi Institute of Technology, Gandipet, Hyderabad 500 075, India

<sup>3</sup>Nano and Molecular Systems Research Unit, University of Oulu, FIN-90014, Finland

\*[Harishchandra.Singh@oulu.fi](mailto:Harishchandra.Singh@oulu.fi)

Table S1. Synthesis conditions for  $\text{Co}_{1-x}\text{Ni}_x\text{TeO}_4$  ( $x = 0, 0.5$  and  $1$ ) nanoparticles for different calcination temperatures and soaking time.

| <b>CTO</b> |          | <b>CNTO</b> |          | <b>NTO</b> |          |
|------------|----------|-------------|----------|------------|----------|
| Temp. (°C) | Time (h) | Temp. (°C)  | Time (h) | Temp. (°C) | Time (h) |
| Pristine   | 0        | Pristine    | 0        | Pristine   | 0        |
| 400        | 24       | 400         | 24       | 400        | 24       |
| 500        | 24       | 500         | 24       | 500        | 24       |

Table S2. EDS analysis presenting atomic percentage of each element for CTO, CNTO and NTO at different calcination temperatures.

|            |
|------------|
| <b>CTO</b> |
|------------|

|                         |       |                   |        |
|-------------------------|-------|-------------------|--------|
| Calcination Temperature | O (%) | Co (%)            | Te (%) |
| Pristine                | 64.80 | 17.54             | 17.66  |
| 400 °C                  | 64.99 | 16.93             | 18.80  |
| 500 °C                  | 65.04 | 16.90             | 18.06  |
| <b>CNTO</b>             |       |                   |        |
| Calcination Temperature | O (%) | Co (%) and Ni (%) | Te (%) |
| Pristine                | 68.74 | 8.51 and 7.92     | 14.83  |
| 400 °C                  | 64.77 | 8.34 and 8.22     | 18.67  |
| 500 °C                  | 69.25 | 7.41 and 7.42     | 15.91  |
| <b>NTO</b>              |       |                   |        |
| Calcination Temperature | O (%) | Co (%)            | Te (%) |
| Pristine                | 68.42 | 15.35             | 16.22  |
| 400 °C                  | 61.95 | 19.57             | 18.48  |
| 500 °C                  | 67.99 | 15.79             | 16.22  |

Table S3. Particle size for CTO, CNTO and NTO at different calcination temperatures.

|                         |                   |
|-------------------------|-------------------|
| <b>CTO</b>              |                   |
| Calcination Temperature | Average size (nm) |
| Pristine                | ~ 3               |
| 400 °C                  | ~ 10              |
| 500 °C                  | ~ 25              |
| <b>CNTO</b>             |                   |
| Calcination Temperature | Average size (nm) |
| Pristine                | ~ 3               |
| 400 °C                  | ~ 8               |
| 500 °C                  | ~ 14              |
| <b>NTO</b>              |                   |
| Calcination Temperature | Average size (nm) |

|          |      |
|----------|------|
| Pristine | ~ 3  |
| 400 °C   | ~ 6  |
| 500 °C   | ~ 13 |

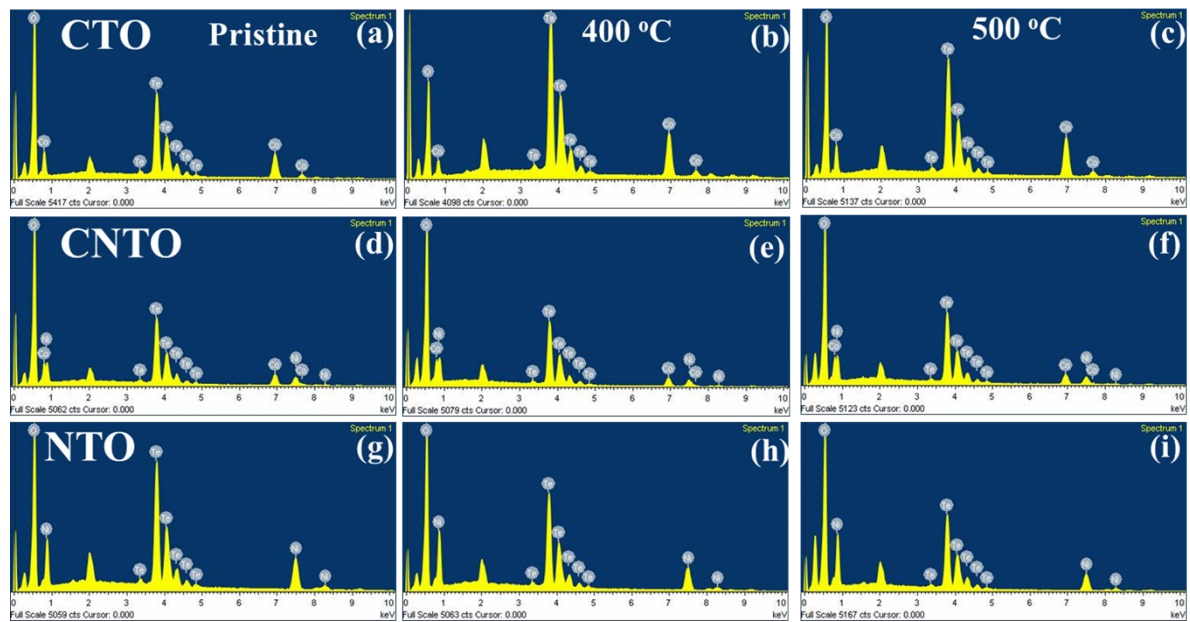

Fig. S1. EDS spectra for (a-c) CTO, (d-f) CNTO and (g-i) NTO at different calcination temperatures.

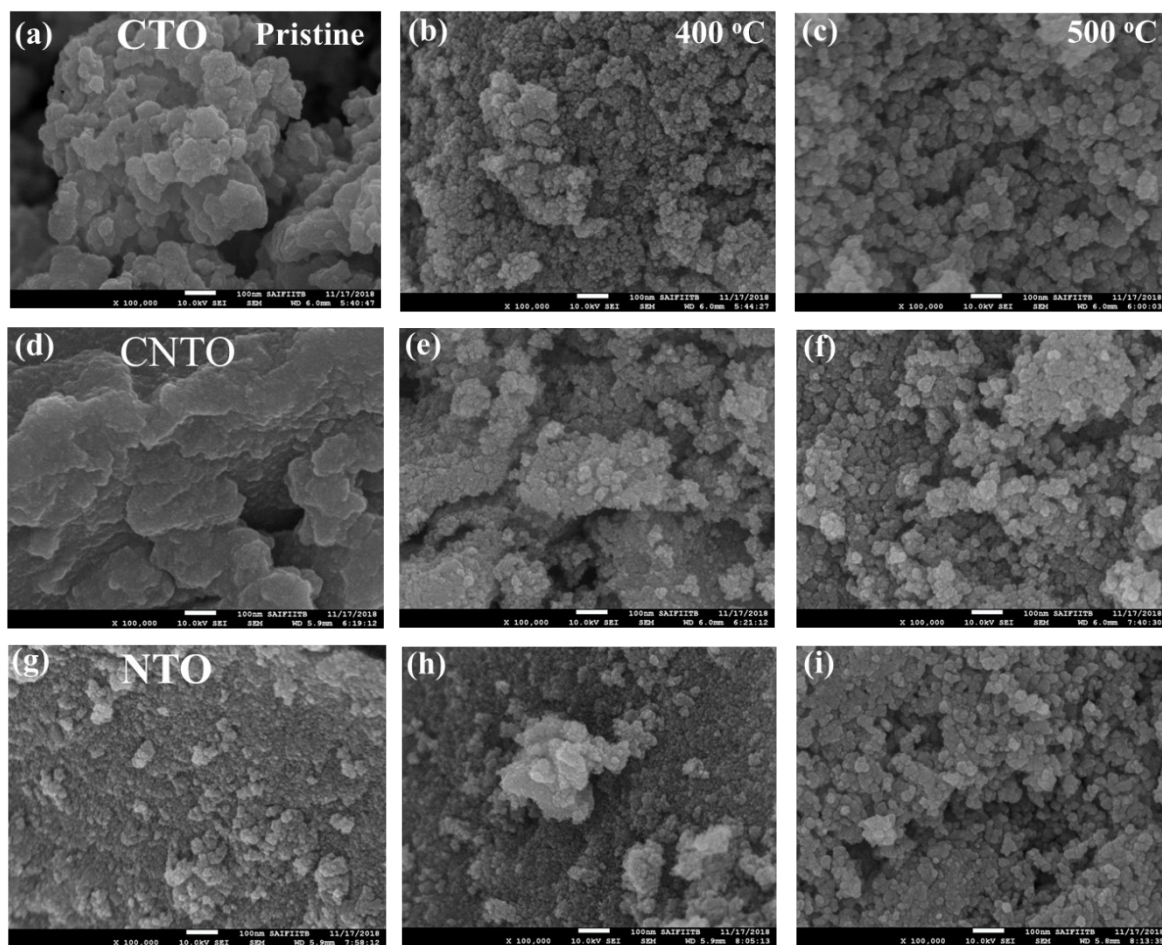

Fig. S2. SEM images of CTO, CNTO and NTO at different calcination temperature for, (a, d and g) pristine sample, calcined at (b, e and h) 400 °C, and (c, f and i) 500 °C, respectively.

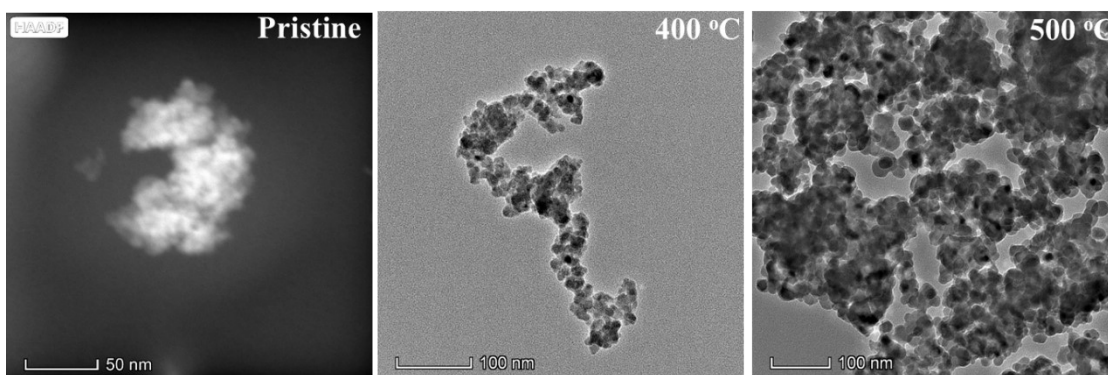

Fig. S3. TEM images for pristine and calcined (400 °C and 500 °C) CTO compounds.
